# Supplementary material for: Reinterpreting π-stacking
Source: Royal Society of Chemistry journal article supplement (doi:10.1039/d0cp05039c), 2020-01-01
Supplement: d0cp05039c1.pdf [file d0cp05039c1.pdf]

## Supporting Information for: “Reinterpreting $\pi$ -Stacking”

Kevin Carter-Fenk and John M. Herbert\*

*Department of Chemistry & Biochemistry, The Ohio State University*

September 8, 2020

### S1 Normalized Planarity Index (NPI)

Here we describe the NPI that was introduced in the context of Fig. 6. An MBD eigenvector  $\phi$  consists of  $3 \times N_{\text{atoms}}$  atomic displacement vectors  $\vec{\phi}_i$  ( $i = 1, \dots, N_{\text{atoms}}$ ), where each  $\vec{\phi}_i$  is an atom-centered vector in three-dimensional space. Let  $\vec{u}$  and  $\vec{v}$  denote vectors that define the plane of interest, with

$$\vec{n} = \|\vec{u} \times \vec{v}\| \quad (\text{S1})$$

being a vector that is perpendicular to the  $\vec{u}$ - $\vec{v}$  plane. The definition of this plane is arbitrary but the choice of a plane that bisects the center-to-center vector of the two monomers is convenient and intuitive. Mapping of the MBD eigenvectors onto the  $\vec{u}$ - $\vec{v}$  plane is accomplished by subtracting the components of each eigenvector that lie orthogonal to the plane, to obtain new vectors

$$\vec{p}_i = \vec{\phi}_i - (\vec{n} \cdot \vec{\phi}_i) \vec{n} / \|\vec{n}\|^2. \quad (\text{S2})$$

The norm  $\|\vec{p}_i\| \in [0, 1]$ , with the value zero suggesting that the original eigenvector  $\vec{\phi}_i$  is orthogonal to the reference plane and  $\|\vec{p}_i\| = 1$  indicating that it is parallel to the reference plane. The total magnitude  $P$  for the the projected eigenvectors is a sum over the magnitudes of the projected eigenvectors that describe each oscillator,

$$P = \sum_i^{N_{\text{atoms}}} \left( \sum_{\alpha=x,y,z} p_{i\alpha}^2 \right)^{1/2}. \quad (\text{S3})$$

The NPI is taken to be the magnitude of the projected eigenvectors normalized to the number of atoms,

$$\text{NPI} = P / N_{\text{atoms}}. \quad (\text{S4})$$

### S2 Additional Data

---

\*herbert@chemistry.ohio-state.edu

| Molecule                        | $\omega/a_0^{-1}$ |
|---------------------------------|-------------------|
| benzene                         | 0.340             |
| naphthalene                     | 0.303             |
| anthracene                      | 0.288             |
| tetracene                       | 0.278             |
| pentacene                       | 0.268             |
| cyclohexane                     | 0.321             |
| perhydronaphthalene             | 0.300             |
| perhydroanthracene              | 0.287             |
| perhydrotetracene               | 0.275             |
| perhydropentacene               | 0.264             |
| C <sub>96</sub> H <sub>24</sub> | 0.230             |
| corannulene                     | 0.277             |

Table S1: Tuned range separation parameters computed using LRC- $\omega$ PBE/def2-TZVPPD.

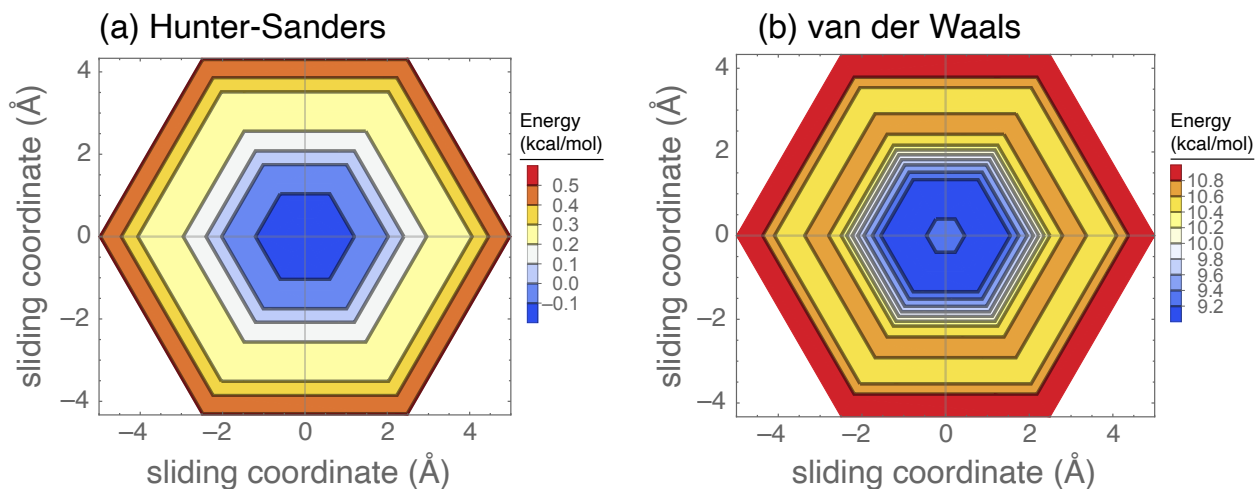

Figure S1: Two-dimensional potential surfaces for cofacial sliding of benzene along the surface of a C<sub>96</sub>H<sub>24</sub> graphene nanoflake, using (a) the Hunter-Sanders electrostatic + dispersion model potential (Ref. 1) and (b) the vdW model potential from c The centers of the two molecules are aligned at the coordinate origin, which is a local minimum in (a) but a saddle point in (b). Note that the absolute energy scale for the vdW model is not meaningful, as the very simple parameterization in Ref. 2 does not include a short-range damping function.

(a) Hunter-Sanders

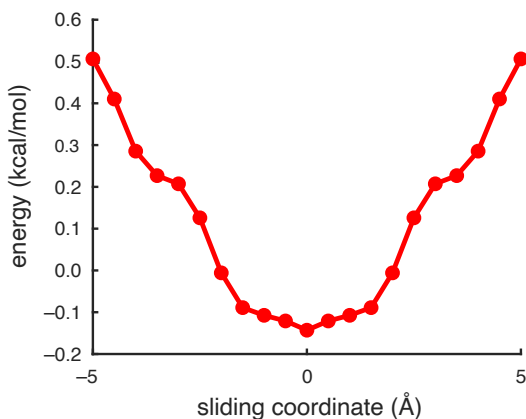

(b) van der Waals

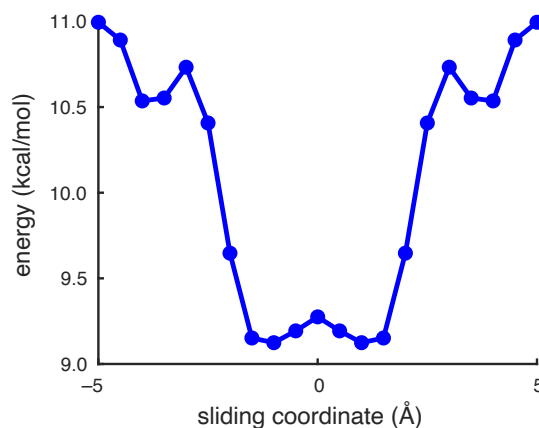

Figure S2: One-dimensional cross sections of the two-dimensional surfaces in Fig. S1, further elucidating the topography near the minimum. (a) The Hunter-Sanders model places benzene at the center of  $C_{96}H_{24}$ , whereas (b) the vdW model predicts that this is geometry is a saddle point, and instead predicts a slightly off-center structure as the minimum. Note that the absolute energy scale for the vdW model is not meaningful, as the very simple parameterization in Ref. 2 does not include a short-range damping function.

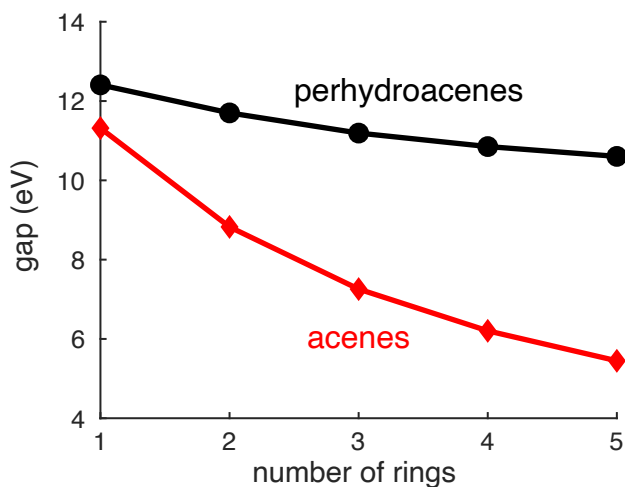

Figure S3: HOMO/LUMO gaps for linear acenes and their saturated analogues, computed at the LRC- $\omega$ PBE/def2-TZVPPD level.

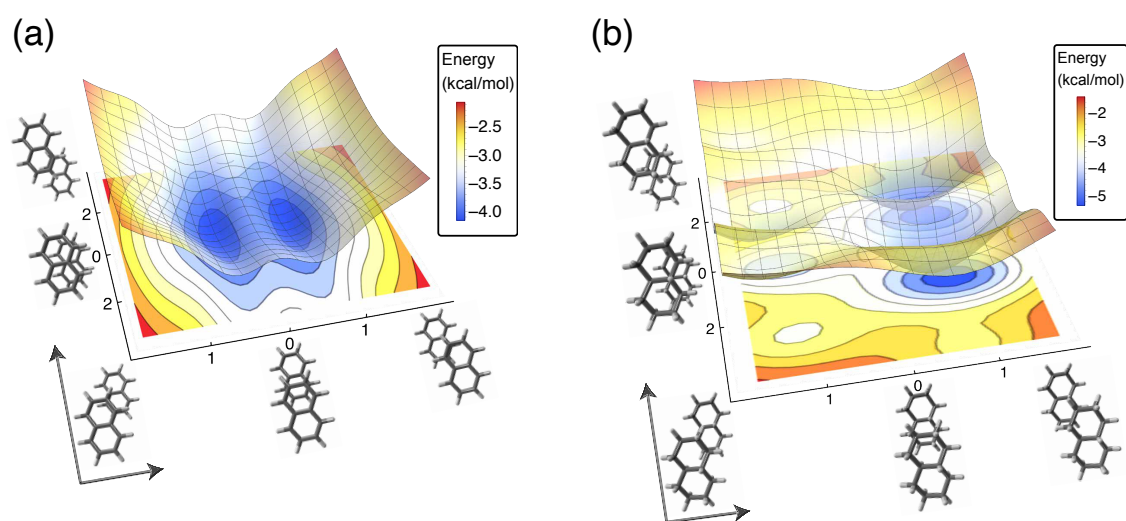

Figure S4: Two-dimensional scan of  $E_{\text{elst+ind}}$  for (a) naphthalene dimer and (b) perhydronaphthalene dimer. The two-dimensional contours illustrate the topography of the potential surface and the cofacial sliding coordinates of the acene dimer and the analogues of the same displacements for perhydronaphthalene dimer.

## References

- [1] Hunter, C. A.; Sanders, J. K. M. The nature of  $\pi$ - $\pi$  interactions. *J. Am. Chem. Soc.* **1990**, *112*, 5525–5534.
- [2] Carter-Fenk, K.; Herbert, J. M. Electrostatics does not dictate the slip-stacked arrangement of aromatic  $\pi$ - $\pi$  interactions. *Chem. Sci.* **2020**, *11*, 6758–6765.
